1 **Title:** Virus-like particle displaying SARS-CoV-2 receptor binding domain elicits neutralizing  
2 antibodies and is protective in a challenge model

3 **Author names and affiliations:** Julia L. McKechnie<sup>a\*</sup>, Brooke Fiala<sup>a\*</sup>, Clancey Wolf<sup>a</sup>, Daniel  
4 Ellis<sup>a</sup>, Douglas Holtzman<sup>a</sup>, Andrew Feldhaus<sup>a</sup>

5 \*These authors have contributed equally to this work

6 <sup>a</sup>Icosavax, Inc.

7 1930 Boren Ave, Suite 1000

8 Seattle, WA 98101, USA

9 **Abstract**

10 While the effort to vaccinate people against severe acute respiratory syndrome coronavirus 2  
11 (SARS-CoV-2) has largely been successful, particularly in the developed world, the rise of new  
12 variants as well as waning immunity illustrate the need for a new generation of vaccines that  
13 provide broader and/or more durable protection against infection and severe disease. Here we  
14 describe the generation and characterization of IVX-411, a computationally designed, two-  
15 component virus-like particle (VLP) displaying the ancestral SARS-CoV-2 receptor binding  
16 domain (RBD) on its surface. Immunization of mice with IVX-411 generates neutralizing  
17 antibodies against the ancestral strain as well as three variants of concern. Neutralizing antibody  
18 titers elicited by IVX-411 are durable and significantly higher than those elicited by  
19 immunization with soluble RBD and spike antigens. Furthermore, immunization with IVX-411  
20 is shown to be protective in a Syrian Golden hamster challenge model using two different strains  
21 of SARS-CoV-2. Overall, these studies demonstrate that IVX-411 is highly immunogenic and  
22 capable of eliciting broad, protective immunity.

23 **Keywords:** SARS-CoV-2 vaccine, virus-like particles, protein nanoparticle, receptor binding  
24 domain, neutralizing antibody response, long-lived plasma cells

25 **Abbreviations:** COVID-19, coronavirus disease 2019; SARS-CoV-2, severe acute respiratory  
26 syndrome coronavirus 2; VOCs, variants of concern; S, spike protein; RBD, receptor binding  
27 domain; ACE2, angiotensin-converting enzyme 2; VLPs, virus-like particles; LLPCs, long-lived  
28 plasma cells; IM, intramuscular; SEC, size exclusion chromatography; DLS, dynamic light  
29 scattering; BLI, biolayer interferometry; nsTEM, negative stain transmission electron  
30 microscopy; PNA, pseudo-particle neutralization assay

### 31 **Background**

32 The coronavirus disease 2019 (COVID-19) pandemic has led to over 637 million  
33 confirmed cases and 6.6 million deaths worldwide as of November 29, 2022 [1]. Our  
34 understanding of this disease as well as the causative virus, SARS-CoV-2, has grown  
35 dramatically since December, 2019 when it emerged in Wuhan, China [2,3]. Acute SARS-CoV-2  
36 infection is characterized by symptoms such as fever, cough, and sore throat. The virus can also  
37 lead to a potentially debilitating condition called ‘long-haul COVID’ [4]. Additionally, the  
38 emergence of variants of concern (VOCs) has illustrated the ability of SARS-CoV-2 to evolve,  
39 leading to increased transmissibility and immune evasion. Given continued viral evolution and  
40 transmission, further advances in SARS-CoV-2 vaccination approaches are necessary to stem the  
41 public health impact.

42 The SARS-CoV-2 spike (S) protein has been the primary target for vaccine development  
43 due to the ability of anti-S protein antibodies to neutralize the virus and protect against severe  
44 disease [5–9]. S protein trimers decorate the surface of the virion and are comprised of two  
45 subunits: S1 and S2 [10,11]. S1 sits at the apex of the S protein and contains the receptor binding

46 domain (RBD). The RBD binds to angiotensin-converting enzyme 2 (ACE2), a protein expressed  
47 in human airway epithelia as well as lung parenchyma [12]. After S1 binds ACE2, the S2 subunit  
48 facilitates viral fusion with the host cell. During this process, the S protein trimer undergoes a  
49 structural transition between its prefusion conformation and its post-fusion conformation,  
50 bringing together the fusion peptide and the host cell membrane, mediating virion entry.  
51 Antibodies which block S1 binding to ACE2 are often potently neutralizing. Consequently, it is  
52 unsurprising that the RBD is the primary target of neutralizing antibodies in human serum  
53 [13,14].

54 Rapid development of vaccines against SARS-CoV-2 was facilitated by two vaccine  
55 platform technologies: messenger RNA (mRNA) and viral vectors. While the deployment of  
56 these vaccines was instrumental in slowing viral transmission and saving lives, the associated  
57 reactogenicity and durability of these vaccines leave room for improvement. Furthermore, the  
58 two viral vector vaccines, Ad26.COV2.S (Janssen) and ChAdOX1-S (AstraZeneca), have been  
59 linked to a rare blood clotting disorder, thrombosis with thrombocytopenia syndrome [15].  
60 Concern over this potentially life-threatening side effect has led to limited use of these vaccines  
61 in developed countries. Waning antibody responses to vaccination, particularly with the mRNA-  
62 based vaccines, have also been described [16]. While two doses of the mRNA-based vaccines,  
63 BNT162b2 (Pfizer) and mRNA1273 (Moderna), were roughly 90% efficacious in preventing  
64 COVID-19 up to two months post immunization, waning antibody responses have resulted in  
65 recommendations to receive multiple additional doses [17–20]. Critically, these first generation  
66 vaccines are also less efficacious against the omicron variant, which has led to an increase in  
67 breakthrough infections [21–23]. Considering these limitations, a new generation of SARS-CoV-  
68 2 vaccines that generate broad, durable immunity with reduced reactogenicity are needed.

69           Virus-like particles (VLPs) are a compelling technology for developing new SARS-CoV-  
70 2 vaccines. Whereas soluble recombinant viral proteins tend to be poorly immunogenic,  
71 particularly in the absence of an adjuvant, VLPs can induce both humoral and cellular immune  
72 responses even without adjuvants [24,25]. One advantage of VLPs is the multivalent presentation  
73 of antigen, which promotes B cell receptor clustering and activation, facilitating the production  
74 of high affinity antibodies [26]. Importantly, VLP-based vaccines displaying native viral  
75 antigens are already commercially available for the prevention of hepatitis B (HBV) and human  
76 papillomavirus (HPV) infection. These vaccines have excellent safety and durability profiles  
77 [27,28]. Vaccination with HBV vaccines generates high antibody titers that are protective for up  
78 to 30 years [29]. Similarly, a single dose of the bivalent HPV vaccine elicits antibody titers that  
79 are maintained for at least seven years [30].

80           Recent advances in computational protein design have allowed for the generation of  
81 novel, self-assembling VLPs that can display diverse antigens [24,25,31–36]. Here we produced  
82 and further characterized a two-component, computationally designed VLP displaying 60 copies  
83 of the ancestral SARS-CoV-2 RBD protein [24], referred to here as IVX-411. We show that  
84 immunization of naïve animals with IVX-411 elicits high neutralizing antibody titers against the  
85 ancestral strain as well as three VOCs. To evaluate the durability of this immune response, as  
86 well as the benefit of the VLP platform over soluble protein, we immunized mice with IVX-411  
87 or soluble S protein. We found that immunization with IVX-411 generated higher neutralizing  
88 titers and increased antigen-specific long-lived plasma cells (LLPCs) compared to immunization  
89 with soluble protein. Finally, Syrian Golden hamsters immunized with IVX-411 and challenged  
90 with SARS-CoV-2 had lower viral loads and reduced disease severity than unimmunized  
91 hamsters.

## 92 **Methods**

93 Component production and characterization: RBD-CompA gene based on previously described  
94 amino acid sequence [24] was synthesized and cloned by Genscript in the pcDNA3.4+ vector.  
95 DNA was transiently transfected into HEK293F cells, which were incubated at 36 °C with 150  
96 rpm shaking for 4 days before harvest by centrifugation, and 0.2 µm filtration. Ni<sup>2+</sup> resin (Indigo,  
97 Cube Biotech, #75110) was added to 4 µL/mL of cellular supernatant following addition of 1 M  
98 Tris pH 8.0 to 50 mM and 5 M NaCl to 300 mM, and incubated with gentle rocking for 2 hours  
99 at room temperature (RT) or 16 hours at 4 °C. The loaded Ni<sup>2+</sup> resin was applied to gravity  
100 columns. The columns were washed with 5 column volumes (CV) of wash buffer (20 mM Tris  
101 pH 8.0, 300 mM NaCl, 30 mM imidazole, 0.75% CHAPS). Proteins were eluted with elution  
102 buffer (20 mM Tris pH 8.0, 300 mM NaCl, 500 mM imidazole, 0.75% CHAPS) and dialyzed  
103 into 20 mM Tris pH 8.0, 250 mM NaCl, 5% glycerol, 0.75% CHAPS buffer 3X. The purified  
104 RBD-CompA was analyzed by SDS-PAGE and UV-Vis (**Supplemental Figure 1**), and  
105 endotoxin levels were determined (Endosafe nexgen-PTS, Charles River; passing value = <10  
106 EU/mg). For manufacture of the CompB pentamer, a transformed *E. coli* Master Cell Bank was  
107 expanded into a stirred-tank bioreactor for fed-batch production. CompB was purified using a  
108 two-column chromatography process and final formulation conducted by tangential flow  
109 filtration. Following purification and formulation, CompB was 0.2 µm filtered and stored at <-  
110 65°C.

111 VLP production: RBD01-CompA and CompB were quantified by UV-Vis prior to mixing in a  
112 1.2X over equimolar ratio. RBD-CompA was added to a tube to a final concentration of 10 µM,  
113 then 20 mM Tris pH 8.0, 250 mM NaCl, 5% glycerol, 0.75% CHAPS buffer was added to bring  
114 the reaction volume up to 1 mL. CompB was added to a final concentration of 8 µM. The

115 reaction was mixed and incubated for 1 hour. The resulting VLP was purified by SEC (Superose  
116 6 Increase, Cytiva, #29091596), eluting around 11 mL, using 20 mM Tris pH 8.0, 250 mM NaCl,  
117 5% glycerol, 0.75% CHAPS buffer as the mobile phase. Peak fractions centered around 11 mL  
118 were pooled and filter-sterilized (0.2  $\mu$ m) prior to analysis. VLP concentrations were quantified  
119 by UV-Vis.

120 UV-Vis spectroscopy: All protein samples were analyzed by UV-Vis on an Agilent Cary 60.  
121 Wavelength scans from 400 to 200 nm were collected, with baseline correction using a matching  
122 buffer blank. Absorbance at 280 nm was used to quantify the protein concentrations with the  
123 molar extinction coefficients and molecular weights as in the following formula:

$$c \left( \frac{mg}{mL} \right) = \frac{A_{280}}{E_c} \cdot MW$$

124 Dynamic Light Scattering: DLS measurements were taken on a nanoDSF instrument (UNcle,  
125 UNchained Laboratories), using autoattenuation of the laser and collecting 10 acquisitions of 5  
126 seconds each at 20 °C.

127 Size Exclusion Chromatography: A Superose 6 Increase 10/300 GL column (Cytiva, #29091596)  
128 was used to purify trimeric RBD-CompA component, IVX-411 *in vitro* assembly reaction (VLP  
129 purification), or IVX-411 purified VLP (analytical), on an AKTA FPLC system (Cytiva, AKTA  
130 Go). Columns were equilibrated using 1.2 CV of SEC purification buffer (20 mM Tris pH 8.0,  
131 250 mM NaCl, 100 mM L-Arginine, 5% glycerol, 0.75% CHAPS), then 0.5-2 mL of sample was  
132 injected onto the column and eluted using 1.2 CV of SEC purification buffer.

133 Biolayer interferometry: Purified RBD-CompA trimeric component, IVX-411 VLP, ACE2-Fc  
134 dimerized receptor, and monoclonal antibodies (mAbs) (CR3022, COVA2-39, and CV07-270)  
135 were diluted to 10  $\mu$ g/mL in BLI assay buffer (PBS pH 7.4, 0.5% BSA, 0.05% Tween 20). 200  
136  $\mu$ L of each dilution and BLI assay buffer were added to black 96-well microplates. Protein A

137 biosensors (Sartorius, #18-5010) were hydrated in BLI assay buffer for 10-20 minutes and  
138 loaded onto an Octet Red96 BLI instrument (Pall, FortéBio). Biosensors were dipped into BLI  
139 assay buffer to obtain a baseline (60 s), loaded with dimerized ACE2-Fc or mAbs (120 s), dipped  
140 into BLI assay buffer, transferred to RBD-CompA and IVX-411 wells (150 s), and dipped back  
141 into BLI assay buffer (150 s).

142 Negative Stain Transmission Electron Microscopy: IVX-411 sample was diluted to 75 µg/mL in  
143 SEC buffer. Sample was adhered to a thick-carbon/Formvar copper 400 mesh grid (Electron  
144 Microscopy Sciences, #CF400-Cu-TH) by pipetting 6 µL of sample directly onto the carbon side  
145 of the grid and incubating for 1 minute. The grid was dipped into a 50 µL droplet of sterile  
146 filtered DI water followed by blotting with grade 1 filter paper (Whatman, #Z240079). The grid  
147 was stained by dipping into a 6 µL drop of 0.75% uranyl formate stain, incubated for 1 minute,  
148 and blotted off. The staining step was repeated, and the grid dried for 1 minute prior to storage.  
149 A Talos L120C TEM microscope, Legikon software, and Gatan camera were used to image the  
150 sample.

151 VLP Prime-Boost study: The in-life portion of this study was conducted at Abcore Inc. Female,  
152 BALB/c mice were immunized IM on days 0 and 21 with 0.2 mg of IVX-411 or IVX-411 +  
153 MF59. Immunizations, once prepared at room temperature, were used immediately or within two  
154 hours of preparation. Serum samples from each animal were collected on Day 0 (prior to  
155 immunization), Day 21 (prior to boost), and on Day 35 (terminal bleed).

156 VLP versus soluble protein duration study: The in-life portion of this study was conducted at  
157 Aragen Bioscience Inc. BALB/c mice were immunized on days 0 and 21 with 0.2 mg of IVX-  
158 411, RBD-CompA, or S-2P formulated with or without MF59. Serum samples were collected on

159 days 0, 20, 35, 63, 91, 119, and 154. Animals were sacrificed on Day 154. Bone marrow was  
160 collected for ELISPOT analysis of LLPCs.

161 ELISpot: The Mouse IgG ELISpot<sup>BASIC</sup> kit, Protocol II (Mabtech, #3825-2A) was used by  
162 Aragen Bioscience Inc to perform LLPC quantification. SARS-CoV-2 antigen RBD01-dn5B was  
163 diluted to 80 mg/mL and used to coat wells of PVDF plates (Mabtech, #3654-WP-10) according  
164 to the assay kit protocol. Anti-mouse IgG was diluted to 20 mg/ mL and was used to coat  
165 additional wells on the same plate. Plates were washed and blocked with assay media for 30  
166 minutes at RT. Cells isolated from femoral bone marrow were resuspended at  $1 \times 10^6$  cells/mL.  
167 100 mL was added to the coated wells. Plates were incubated at 33°C for 14-16 hours. Spots  
168 counts/well were determined using a Zellnet Consulting ELISpot reader.

169 Syrian Golden hamster efficacy study: The in-life portion of this study was conducted at  
170 Lovelace Biomedical. 36 male, SGHs were purchased from Charles River. 16 hamsters were  
171 immunized IM with 0.2 mg IVX-411 formulated with MF59 on days 0 and 21. Remaining  
172 hamsters were immunized with PBS. Serum samples were collected on days 0, 21, and 35. Body  
173 weights were measured starting on Day 39. On Day 42 8 IVX-411 immunized hamsters and 8  
174 PBS immunized hamsters were challenged via intranasal instillation with  $4.64 \times 10^5$   
175 TCID<sub>50</sub>/animal of WA1/2020; 8 IVX-411 immunized hamsters and 8 PBS immunized hamsters  
176 were challenged with  $1.53 \times 10^6$  TCID<sub>50</sub>/animal of B.1.617.2. Animals were sacrificed on Day  
177 47 and lung weights were measured. Lungs were fixed in NBF, trimmed, paraffin embedded,  
178 sectioned at 4 mm, and stained with hematoxylin and eosin for microscopic examination.  
179 Histopathologic findings were graded subjectively on a scale of 1 to 5. The Provantis<sup>TM</sup> (Instem  
180 LSS Ltd., Staffordshire, England) computer software was used for necropsy and histopathology  
181 data acquisition, reporting, and analysis.



182 RT-qPCR: RT-qPCR analysis on lung and nasal swab samples collected from the Syrian Golden  
183 hamster study were performed at Lovelace Biomedical. Samples were processed in Trizol using  
184 a TissueLyser and centrifuged at 4000 x g for 5 minutes. RNA extraction was performed on  
185 supernatants using the QIAGEN RNeasy kit according to the manufacturer's instructions.  
186 Samples were run in triplicate and genome copies per mL or gram equivalents were calculated  
187 from a standard curve generated from RNA standards of known copy concentration. The N and E  
188 gene primers and probe sequences were as follows:

189 N gene:

190 SARS-CoV-2 Forward: 5' TTACAAACATTGGCCGCAA 3'

191 SARS-CoV-2 Reverse: 5' GCGCGACATTCCGAAGAA 3'

192 SARS-CoV-2 Probe: 6FAM-ACAATTTGCCCCAGCGCTTCAG-BHQ-1

193 E gene:

194 SARS-CoV-2 Forward: 5' ACAGGTACGTTAATAGTTAATAGCGT 3'

195 SARS-CoV-2 Reverse: 5' ATATTGCAGCAGTACGCACACA 3'

196 SARS-CoV-2 Probe: 6FAM-ACACTAGCCATCCTTACTGCGCTTCG-BHQ-1

197 SARS-CoV-2 Pseudo-particle Neutralization Assay (PNA): PNA assays were performed at  
198 Nexelis. ACE-2 expressing Vero E6 cells (ATCC CRL-1586) were seeded in a 96-well  
199 microtiter plate at 20,000 cells/well. Serum samples and controls were heat-inactivated at 56°C  
200 for 30 minutes, diluted in duplicate in cell medium, and serial two-fold dilutions were performed.  
201 Each SARS-CoV-2 pseudovirus was diluted to reach a desired concentration, added to the  
202 diluted serum samples, and incubated at 37°C in 5% CO<sub>2</sub> for 1 hour. This mixture was added to  
203 the cells at 80% confluency. Plates were incubated for 18-22 hours at 37°C in 5% CO<sub>2</sub> before  
204 supernatants were removed. 50 mL of ONE-Glo EX Luciferase Assay Substrate (Promega,

205 #E8110) diluted 1:2 in cell media was added to each well and incubated at RT for 3 minutes with  
206 agitation. Luminescence across all wavelengths was measured for 0.5 seconds using a  
207 SpectraMax iD3 microplate reader and SoftMax Pro v7.0.1 (Molecular Devices). A titration  
208 curve using a 4-parameter logistic regression was made for each dilution. The reciprocal dilution  
209 of the sample for which the luminescence was equal to a pre-defined cut-point of 50 was  
210 reported as the titer. The cut-point was determined using linear regression using 50% flanking  
211 points.

## 212 **Results**

### 213 Production and characterization of two-component I53-50 VLPs displaying ancestral SARS- 214 CoV-2 RBD

215 A two-component, computationally designed protein VLP, referred to as I53-50 [35], was  
216 utilized to display the ancestral (Wuhan-Hu-1) SARS-CoV-2 RBD to improve the  
217 immunogenicity of the monomeric antigen as previously described [24]. I53-50 is a 120-subunit  
218 VLP comprised of 20 homotrimeric (CompA) and 12 homopentameric (CompB) subunits,  
219 capable of *in vitro* assembly following purification and subsequent mixing of the individual  
220 components [35,37]. The his-tagged SARS-CoV-2 RBD antigen was displayed on I53-50 by  
221 genetically fusing the C-terminus of the antigen to the N-terminus of the CompA subunit using a  
222 16-residue glycine-serine linker (RBD-CompA) [24]. RBD-CompA and CompB were  
223 individually expressed in HEK293F and *E. coli* cells, respectively, and purified prior to mixing  
224 in equimolar ratios to induce spontaneous self-assembly of VLPs *in vitro* (**Figure 1A**).  
225 Following purification by size exclusion chromatography (SEC) to remove residual components,  
226 the resulting RBD-I53-50 VLPs (IVX-411) were characterized for identity, aggregation state,  
227 antigenicity and VLP structural integrity. UV-Vis spectroscopy wavelength scan analysis

228 showed a peak at 280 nm and low-level scattering typical of non-aggregated, well-formed VLPs  
229 (ratio of absorbance at 320 nm to 280 nm = ~0.1) (**Figure 1B**). Dynamic light scattering (DLS)  
230 measurements suggested non-aggregated, monodispersed VLPs with a polydispersity index of  
231 11.8% (**Figure 1C**). Analytical SEC of purified IVX-411 resulted in a resolved peak centered  
232 around 11 mL, consistent with the calculated molecular weight of the VLP (**Figure 1D**). IVX-  
233 411 eluted earlier than the constituent components (**Figure 1D**). The antigen appeared intact  
234 based on binding to ACE2-Fc, as well as three additional anti-RBD monoclonal antibodies, as  
235 measured by biolayer interferometry (BLI) (**Figure 1E**). Finally, negative stain transmission  
236 electron microscopy (nsTEM) confirmed that the VLP sample consisted of monodispersed, intact  
237 VLPs of the expected diameter (**Figure 1F**).

#### 238 Animals primed and boosted with IVX-411 develop robust neutralizing titers against three VOCs

239 We evaluated the ability of IVX-411 to induce neutralizing antibody titers against the  
240 ancestral SARS-CoV-2 strain as well as three variants of concern (beta, gamma, and delta).  
241 Naïve BALB/c mice were immunized intramuscularly (IM) on Day 0 and Day 21 with 0.2 mg of  
242 IVX-411 formulated with CSL Seqirus' proprietary oil-in-water adjuvant, MF59 (**Figure 2A**).  
243 Mice were bled on Day 0 (pre-immunization), Day 21 (pre-boost), and on Day 35 (14 days post-  
244 boost). Neutralizing titers against the ancestral strain and the beta variant were measured at all  
245 time points using a cell-based pseudo-particle neutralization assay (PNA). Neutralizing titers  
246 against gamma and delta variants were measured using only the Day 35 samples.

247 Three weeks after the initial priming dose, mice immunized with IVX-411 had an  
248 average Day 21 neutralizing antibody titer (NT<sub>50</sub>) of  $2.1 \times 10^2$  against the ancestral strain  
249 (**Figure 2B**) and an average neutralizing antibody titer of  $1.4 \times 10^2$  against the beta variant  
250 (**Figure 2C**). After receiving a booster immunization, the Day 35 neutralizing titers against the

251 ancestral strain increased 45-fold. Similarly, a 78-fold increase in neutralizing titers against the  
252 beta variant was also observed. Mice primed and boosted with IVX-411 had an average  
253 neutralizing titer against the gamma variant of  $2.58 \times 10^4$  (**Figure 2D**). Neutralizing titers against  
254 the delta variant were lower than those against gamma, beta, and the ancestral strain, with an  
255 average neutralizing titer of  $3.71 \times 10^3$  (**Figure 2E**). Day 35 neutralizing antibody titers against  
256 all four strains were higher than those of control human convalescent sera. Together, these  
257 results demonstrate that immunization with IVX-411 results in a broad, potent antibody  
258 response.

259 Immunization with IVX-411 induces a more potent humoral immune response than  
260 immunization with soluble protein

261 Having confirmed the immunogenicity of IVX-411, we next sought to evaluate its ability  
262 to elicit durable, humoral immunity compared to trimeric spike-based and RBD-based soluble  
263 antigens. Naïve BALB/c mice were immunized on Day 0 and boosted on Day 21 with either 0.2  
264 mg of IVX-411, an equivalent antigen dose of RBD-CompA (0.15  $\mu$ g), or an equivalent RBD  
265 antigen dose of S-2P (0.4  $\mu$ g), a stabilized prefusion version of the S protein ectodomain (**Figure**  
266 **3A**). Each antigen was formulated with either MF59 or an aqueous buffer. Serum samples were  
267 collected on days 0, 20, 35, 63, 91, 119, and 154. On Day 154 the animals were sacrificed, at  
268 which point LLPCs were isolated from the bone marrow and assessed by ELISpot.

269 Serum analysis by a cell-based PNA revealed that immunization with IVX-411 generated  
270 higher neutralizing antibody titers than immunization with soluble proteins. On Day 20, after a  
271 single immunization, only animals immunized with IVX-411 had neutralizing antibody titers  
272 above the lower limit of quantitation (**Figure 3B**). Even at this early timepoint, MF59 enhanced  
273 the neutralizing antibody response in naïve animals with the IVX-411 MF59 group having 4.4-

274 fold higher Day 20 neutralizing antibody titers compared to animals immunized with IVX-411  
275 alone. This trend was consistent throughout the duration of the study. Compared to the aqueous  
276 formulations, immunization with antigen plus MF59 resulted in 16, 3.1, and 116-fold increases  
277 in Day 35 neutralizing antibody titers for IVX-411, RBD-CompA, and S-2P, respectively.  
278 Importantly, the Day 35 neutralizing antibody titers in the IVX-411 MF59 group were 198-fold  
279 higher than those in the RBD-CompA MF59 group and 5.3-fold higher than those in the S-2P  
280 MF59 group. These results suggest that immunization with IVX-411 results in higher  
281 neutralizing antibody titers than immunization with soluble protein, particularly compared with  
282 soluble trimerized RBD, which is poorly immunogenic on its own. There were no statistically  
283 significant differences in the neutralizing antibody titers within the different treatment groups  
284 from Day 35 to Day 154, except for the RBD-CompA MF59 group. Unlike the other groups,  
285 neutralizing antibody titers following a second administration of RBD-CompA MF59 did not  
286 reach their peak until Day 154. The 7.9-fold increase in titers on Day 154 compared to Day 35  
287 rose to the level of statistical significance. While the overall consistency of neutralizing antibody  
288 titers post-boost reveals the durability of the humoral immune response elicited by immunization  
289 in general, these results show that immunization with IVX-411 leads to higher neutralizing titers.

290 To further evaluate the ability of IVX-411 to generate a long-term humoral immune  
291 response, an ELISpot assay was performed on isolated LLPCs. Similar to the neutralizing  
292 antibody titer results, these results demonstrated adjuvantation was key to generating a sizable  
293 RBD-specific LLPC compartment in naïve animals. There were no statistically significant  
294 differences in the number of RBD-specific LLPCs between the aqueous conditions. (**Figure 3C**).  
295 Compared to the aqueous formulations, immunization with antigen plus MF59 resulted in 4.3,  
296 1.8, and 4.4-fold increases in LLPC counts for IVX-411, RBD-CompA, and S-2P, respectively.

297 Immunization with IVX-411 MF59 resulted in a statistically significant, 3.9-fold increase in the  
298 number of LLPCs compared to immunization with RBD-CompA MF59. The 1.2-fold increase in  
299 LLPC counts observed in the IVX-411 MF59 immunized group compared to the S-2P MF59  
300 immunized group was modest and did not reach the level of statistical significance. These results  
301 demonstrate that immunization with IVX-411 in the presence of an oil-in-water emulsion  
302 induces durable neutralizing antibody titers, which along with LLPC counts, are superior to those  
303 induced by immunization with soluble antigens.

304 Immunization with IVX-411 reduces disease severity and viral load in Syrian Golden hamster  
305 model

306 To evaluate whether IVX-411 could protect against SARS-CoV-2 infection, a viral  
307 challenge study using WA1/2020 (ancestral) and B.1.671.2 (delta) strains was performed in  
308 Syrian Golden hamsters. Hamsters were randomly assigned to five treatment groups: PBS,  
309 Unchallenged; PBS, WA1/2020; PBS, B.1.617.2; IVX-411, WA1/2020; and IVX-411, B.1.671.2  
310 (**Figure 4A**). On Day 0 and Day 21 hamsters in the IVX-411, WA1/2020, and IVX-411,  
311 B.1.617.2 groups were immunized with IVX-411 formulated with MF59. Hamsters in the other  
312 three treatment groups (PBS, Unchallenged; PBS, WA1/2020; and PBS, B.1.617.2), were  
313 injected with PBS. Hamsters were weighed and bled on days 0, 21, and 35. On Day 42 all  
314 hamsters, except those in the PBS, Unchallenged group, were inoculated intranasally with either  
315  $4.64 \times 10^5$  TCID<sub>50</sub>/animal of WA1/2020 or  $1.53 \times 10^6$  TCID<sub>50</sub>/animal of B.1.617.2. Body  
316 weights were recorded daily from Day 39 to Day 47, at which point animals were sacrificed and  
317 lung tissue as well as nasal swabs were collected. Hamsters challenged with either WA1/2020 or  
318 B.1.617.2 began to lose weight four to five days post challenge (**Figure 4B**). By six days post  
319 challenge, hamsters immunized with IVX-411 had significantly higher body weights compared

320 to their unimmunized counterparts. Interestingly, this reduction in weight loss was more  
321 pronounced in animals challenged with B.1.617.2 compared to WA1/2020, despite the higher  
322 B.1.617.2 challenge dose. This continued to be the case until the termination of the study on Day  
323 47.

324 As SARS-CoV-2-induced pneumonia develops, lung weight increases relative to body  
325 weight due to cellular infiltrates, edema, and a decrease in overall body weight. Consequently,  
326 we investigated the ability of immunization with IVX-411 to prevent an increase in lung weight.  
327 As expected, hamsters in the PBS, WA1/2020 and PBS, B.1.617.2 groups had increased lung  
328 weight compared to hamsters in the PBS, Unchallenged group (**Figure 4C**). However, this was  
329 only statistically significant in animals challenged with B.1.617.2. Similarly, unimmunized  
330 animals challenged with either WA1/2020 or B.1.617.2 had a 1.2 or 1.6-fold increase in lung  
331 weight as a percent of body weight respectively compared to their IVX-411 immunized  
332 counterparts. Immunization with IVX-411 led to a statistically significant reduction in lung  
333 weight in the context of challenge with B.1.617.2 and a trend towards lower lung weights in  
334 hamsters challenged with WA1/2020.

335 In addition to lung and body weight, the impact of IVX-411 immunization on  
336 histopathologic changes associated with SARS-CoV-2 infection were also assessed (**Figure 4D**).  
337 The two challenge strains led to slightly different tissue changes in unimmunized animals.  
338 B1.617.2 infection led to more hemorrhage and less centriacinar and bronchiolar epithelial  
339 hypertrophy/hyperplasia compared to WA1/2020. The impact of IVX-411 immunization on lung  
340 pathology was the most notable in animals challenged with B1.617.2. Animals immunized with  
341 IVX-411 and then challenged with B1.617.2 had milder inflammation, reduced pulmonary  
342 hemorrhage, and decreased severity of bronchiolar epithelial hyperplasia/hypertrophy compared

343 to unimmunized animals. In the case of challenge with WA1/2020, immunization resulted in  
344 more subtle decreases in the severity of inflammation, pulmonary hemorrhage, and centriacinar  
345 hyperplasia/hypertrophy. The severity of bronchiolar epithelial hyperplasia/hypertrophy was  
346 markedly improved when animals challenged with WA1/2020 had been previously immunized  
347 with IVX-411.

348 To further assess the level of protection conferred by immunization with IVX-411, lung  
349 tissue and nasal swabs were assessed for genomic RNA (N gene) and subgenomic RNA (E gene)  
350 by RT-qPCR. Genomic RNA measures both viable and nonviable viral genomes whereas  
351 subgenomic RNA is a measure of replicating virus levels. IVX-411 immunization significantly  
352 reduced the number of N gene copies per gram of lung tissue 31 and 66-fold and the number of  
353 N gene copies per nasal swab 4.4 and 3-fold in hamsters challenged with WA1/2020 and  
354 B.1.617.2, respectively (**Figure 5A**). Consistent with the N gene results, IVX-411 immunization  
355 reduced the number of E gene copies per gram of lung tissue 60 and 132-fold and the number of  
356 E gene copies per nasal swab 5 and 3-fold in hamsters challenged with WA1/2020 and  
357 B.1.617.2, respectively (**Figure 5B**). However, the decreases in N and E gene copies in nasal  
358 swab samples collected from immunized animals did not reach the level of statistical  
359 significance.

360 Finally, to determine whether neutralizing antibodies elicited by IVX-411 vaccination  
361 were contributing to the observed protection, we evaluated the neutralizing antibody response  
362 elicited in the animals immunized with IVX-411 prior to challenge using a cell-based PNA. On  
363 Day 35, neutralizing antibody titers against both the ancestral and delta variant were present in  
364 six out of eight IVX-411, WA1/2020 hamsters and all eight IVX-411, B.1.617.2 hamsters  
365 (**Figure 5C**). Neutralizing titers against the ancestral strain increased approximately 14.5-fold in



366 IVX-411 immunized animals compared to baseline. A roughly 3.8-fold increase in neutralizing  
367 titers against the delta variant was also observed. Overall, these results demonstrate that  
368 prophylactic immunization with IVX-411 is protective against severe manifestations of SARS-  
369 CoV-2 infection in Syrian Golden hamsters.

## 370 **Discussion**

371 As SARS-CoV-2 becomes endemic, there is great interest in identifying vaccines with  
372 improved durability, less reactogenicity, and the potential for combination with other vaccines,  
373 such as seasonal influenza. VLPs have been shown to be highly immunogenic and possess many  
374 of the characteristics that may be of value for a next-generation SARS CoV-2 vaccine. Here, we  
375 show that IVX-411, a computationally designed VLP presenting the RBD of the ancestral SARS-  
376 CoV-2 strain, is immunogenic in two rodent models. In mice, immunization with IVX-411 elicits  
377 neutralizing titers against the ancestral strain as well as three VOCs. These neutralizing antibody  
378 titers are durable and higher than those generated in response to immunization with a soluble  
379 spike protein. Critically, immunization with IVX-411 is protective in a Syrian Golden hamster  
380 challenge model. Together, these results further illustrate the potential of VLPs to be utilized as a  
381 modality for future SARS-CoV-2 vaccines.

382 These data for IVX-411 are consistent with a large number of preclinical studies on I53-  
383 50 immunogens displaying RBD antigens from SARS-CoV-2 and/or other sarbecoviruses  
384 [24,31,38], and further demonstrate the precision and immunogenic potency of this platform. In  
385 naïve animals, higher neutralizing titers against SARS-CoV-2 were observed after immunization  
386 with I53-50 VLPs displaying 60 copies of the RBD compared to soluble S protein trimers and  
387 trimerized RBD antigens [24,39]. Interestingly, we observed IVX-411 generated higher  
388 neutralizing antibody titers in naïve mice than in Syrian Golden hamsters. However, differences

389 in neutralizing antibody titers between different animal models are consistent with what others  
390 have reported [32,40]. Further, we observed improved potency in naïve animals by formulating  
391 IVX-411 with MF59, an oil-in-water emulsion. Such results have been externally replicated for  
392 I53-50-based SARS-CoV-2 vaccines in naïve human patients [38,41–43]. Our results are  
393 immunogenically similar to those observed from other RBD-based, single-component, SARS-  
394 CoV-2 VLP vaccines, which use nanoparticles such as ferritin [44,45], hepatitis B surface  
395 antigen [46], or mi3 (a variant of the I3-01 VLP) [47–50], as well as biochemical conjugation  
396 methods such as SpyCatcher and sortase [45,47]. In comparison to these single-component VLP  
397 platforms, the two-component nature of I53-50 allows for simplified and modular manufacturing  
398 of highly defined immunogen structures through *in vitro* assembly. The precise structure of the  
399 final VLP product is enabled both by direct genetic fusion between antigens and CompA,  
400 eliminating the need for conjugation, as well as dependable complete and cooperative assembly  
401 of the nanoparticle structure due to highly-specific designed interactions between CompA and  
402 CompB [35,37]. Finally, the manufacturing and clinical validation of I53-50-based vaccines for  
403 SARS-CoV-2 [43] and RSV (Icosavax, Inc. unpublished data) confirms that this platform is  
404 scalable, manufacturable, and potently immunogenic while maintaining low reactogenicity, with  
405 ample potential to extend to other viral and bacterial indications.

406         The emergence of the omicron SARS-CoV-2 variant in November, 2021 led to a surge of  
407 infections in December, 2021 through March, 2022 [1]. Given the ability of the omicron variant  
408 to escape preexisting immunity elicited by both natural infection and immunization, updated  
409 booster vaccines targeting the omicron variant as well as the ancestral strain are now  
410 recommended for those 12 and older. The I53-50 VLP platform utilized in IVX-411 has the  
411 potential to combine multiple SARS-CoV-2 antigens to direct immune responses against several

412 VOCs, including omicron. This platform also has the potency and low reactogenicity needed to  
413 generate combination vaccines which could include additional VLP-based vaccines against other  
414 viruses. Prior experience with omicron suggests that future updates to SARS-CoV-2 vaccines  
415 may be necessary as well as routine booster immunizations. The modular ability for antigen  
416 presentation on I53-50 VLPs in response to emerging VOCs, combined with the potential use of  
417 high-yield, stabilized RBD designs [39], can enable this platform to meet many needs for future  
418 COVID-19 vaccination.

#### 419 **Declaration of Competing Interest**

420 All authors are employees and stockholders of Icosavax, Inc.

#### 421 **Acknowledgements**

422 This work was supported in part by the Bill & Melinda Gates Foundation [INV-022092]. Under  
423 the grant conditions of the Foundation, a Creative Commons Attribution 4.0 Generic License has  
424 already been assigned to the Author Accepted Manuscript version that might arise from this  
425 submission. Thanks to Seqirus for providing MF59. Subfigures 2A, 3A, and 4A were created  
426 with BioRender.com. Figure 1A was made with UCSF ChimeraX, developed by the Resource  
427 for Biocomputing, Visualization, and Informatics at UCSF, with support from NIH  
428 R01GM129325 and the Office of Cyber Infrastructure and Computational Biology, NIAID.

#### 429 **References**

- 430 [1] WHO Coronavirus (COVID-19) dashboard n.d. <https://covid19.who.int> (accessed July 6,  
431 2022).
- 432 [2] Zhou P, Yang X-L, Wang X-G, Hu B, Zhang L, Zhang W, et al. A pneumonia outbreak  
433 associated with a new coronavirus of probable bat origin. *Nature* 2020;579:270–3.

- 434 [3] Zhu N, Zhang D, Wang W, Li X, Yang B, Song J, et al. A novel Coronavirus from patients  
435 with pneumonia in China, 2019. *N Engl J Med* 2020;382:727–33.
- 436 [4] Mehandru S, Merad M. Pathological sequelae of long-haul COVID. *Nat Immunol*  
437 2022;23:194–202.
- 438 [5] Rogers TF, Zhao F, Huang D, Beutler N, Burns A, He W-T, et al. Isolation of potent SARS-  
439 CoV-2 neutralizing antibodies and protection from disease in a small animal model. *Science*  
440 2020;369:956–63.
- 441 [6] Zost SJ, Gilchuk P, Case JB, Binshtein E, Chen RE, Nkolola JP, et al. Potently neutralizing  
442 and protective human antibodies against SARS-CoV-2. *Nature* 2020;584:443–9.
- 443 [7] Liu L, Wang P, Nair MS, Yu J, Rapp M, Wang Q, et al. Potent neutralizing antibodies  
444 against multiple epitopes on SARS-CoV-2 spike. *Nature* 2020;584:450–6.
- 445 [8] Brouwer PJM, Caniels TG, van der Straten K, Snitselaar JL, Aldon Y, Bangaru S, et al.  
446 Potent neutralizing antibodies from COVID-19 patients define multiple targets of  
447 vulnerability. *Science* 2020;369:643–50.
- 448 [9] Cao Y, Su B, Guo X, Sun W, Deng Y, Bao L, et al. Potent neutralizing antibodies against  
449 SARS-CoV-2 identified by high-throughput single-cell sequencing of convalescent patients’  
450 B cells. *Cell* 2020;182:73-84.e16.
- 451 [10] Ke Z, Oton J, Qu K, Cortese M, Zila V, McKeane L, et al. Structures and distributions of  
452 SARS-CoV-2 spike proteins on intact virions. *Nature* 2020;588:498–502.
- 453 [11] Huang Y, Yang C, Xu X-F, Xu W, Liu S-W. Structural and functional properties of SARS-  
454 CoV-2 spike protein: potential antiviral drug development for COVID-19. *Acta Pharmacol*  
455 *Sin* 2020;41:1141–9.

- 456 [12] Jia HP, Look DC, Shi L, Hickey M, Pewe L, Netland J, et al. ACE2 receptor expression and  
457 severe acute respiratory syndrome coronavirus infection depend on differentiation of human  
458 airway epithelia. *J Virol* 2005;79:14614–21.
- 459 [13] Steffen TL, Stone ET, Hassert M, Geerling E, Grimberg BT, Espino AM, et al. The receptor  
460 binding domain of SARS-CoV-2 spike is the key target of neutralizing antibody in human  
461 polyclonal sera. *BioRxiv* 2020. <https://doi.org/10.1101/2020.08.21.261727>.
- 462 [14] Piccoli L, Park Y-J, Tortorici MA, Czudnochowski N, Walls AC, Beltramello M, et al.  
463 Mapping neutralizing and immunodominant sites on the SARS-CoV-2 spike receptor-  
464 binding domain by structure-guided high-resolution serology. *Cell* 2020;183:1024-  
465 1042.e21.
- 466 [15] Lai C-C, Ko W-C, Chen C-J, Chen P-Y, Huang Y-C, Lee P-I, et al. COVID-19 vaccines  
467 and thrombosis with thrombocytopenia syndrome. *Expert Rev Vaccines* 2021;20:1027–35.
- 468 [16] Ferdinands JM, Rao S, Dixon BE, Mitchell PK, DeSilva MB, Irving SA, et al. Waning 2-  
469 dose and 3-dose effectiveness of mRNA vaccines against COVID-19-associated emergency  
470 department and urgent care encounters and hospitalizations among adults during periods of  
471 Delta and Omicron variant predominance - VISION Network, 10 states, August 2021-  
472 January 2022. *MMWR Morb Mortal Wkly Rep* 2022;71:255–63.
- 473 [17] Moreira ED Jr, Kitchin N, Xu X, Dychter SS, Lockhart S, Gurtman A, et al. Safety and  
474 efficacy of a third dose of BNT162b2 Covid-19 vaccine. *N Engl J Med* 2022;386:1910–21.
- 475 [18] Menni C, May A, Polidori L, Louca P, Wolf J, Capdevila J, et al. COVID-19 vaccine  
476 waning and effectiveness and side-effects of boosters: a prospective community study from  
477 the ZOE COVID Study. *Lancet Infect Dis* 2022;22:1002–10.

- 478 [19] Barda N, Dagan N, Cohen C, Hernán MA, Lipsitch M, Kohane IS, et al. Effectiveness of a  
479 third dose of the BNT162b2 mRNA COVID-19 vaccine for preventing severe outcomes in  
480 Israel: an observational study. *Lancet* 2021;398:2093–100.
- 481 [20] Magen O, Waxman JG, Makov-Assif M, Vered R, Dicker D, Hernán MA, et al. Fourth dose  
482 of BNT162b2 mRNA Covid-19 vaccine in a nationwide setting. *N Engl J Med*  
483 2022;386:1603–14.
- 484 [21] Gardner BJ, Kilpatrick AM. Estimates of reduced vaccine effectiveness against  
485 hospitalization, infection, transmission and symptomatic disease of a new SARS-CoV-2  
486 variant, Omicron (B.1.1.529), using neutralizing antibody titers. *BioRxiv* 2021.  
487 <https://doi.org/10.1101/2021.12.10.21267594>.
- 488 [22] Lopez Bernal J, Gower C, Andrews N, Public Health England Delta Variant Vaccine  
489 Effectiveness Study Group. Effectiveness of covid-19 vaccines against the B.1.617.2 (delta)  
490 variant. Reply. *N Engl J Med* 2021;385:e92.
- 491 [23] Higdon MM, Baidya A, Walter KK, Patel MK, Issa H, Espié E, et al. Duration of  
492 effectiveness of vaccination against COVID-19 caused by the omicron variant. *Lancet*  
493 *Infect Dis* 2022. [https://doi.org/10.1016/S1473-3099\(22\)00409-1](https://doi.org/10.1016/S1473-3099(22)00409-1).
- 494 [24] Walls AC, Fiala B, Schäfer A, Wrenn S, Pham MN, Murphy M, et al. Elicitation of potent  
495 neutralizing antibody responses by designed protein nanoparticle vaccines for SARS-CoV-  
496 2. *Cell* 2020;183:1367-1382.e17.
- 497 [25] Marcandalli J, Fiala B, Ols S, Perotti M, de van der Schueren W, Snijder J, et al. Induction  
498 of potent neutralizing antibody responses by a designed protein nanoparticle vaccine for  
499 respiratory syncytial virus. *Cell* 2019;176:1420-1431.e17.

- 500 [26] Bachmann MF, Rohrer UH, Kündig TM, Bürki K, Hengartner H, Zinkernagel RM. The  
501 influence of antigen organization on B cell responsiveness. *Science* 1993;262:1448–51.
- 502 [27] Wang JW, Roden RBS. Virus-like particles for the prevention of human papillomavirus-  
503 associated malignancies. *Expert Rev Vaccines* 2013;12:129–41.
- 504 [28] López-Sagaseta J, Malito E, Rappuoli R, Bottomley MJ. Self-assembling protein  
505 nanoparticles in the design of vaccines. *Comput Struct Biotechnol J* 2016;14:58–68.
- 506 [29] Bruce MG, Bruden D, Hurlburt D, Zanis C, Thompson G, Rea L, et al. Antibody levels and  
507 protection after hepatitis B vaccine: Results of a 30-year follow-up study and response to a  
508 booster dose. *J Infect Dis* 2016;214:16–22.
- 509 [30] Kreimer AR, Herrero R, Sampson JN, Porras C, Lowy DR, Schiller JT, et al. Evidence for  
510 single-dose protection by the bivalent HPV vaccine—Review of the Costa Rica HPV  
511 vaccine trial and future research studies. *Vaccine* 2018;36:4774–82.
- 512 [31] Walls AC, Miranda MC, Schäfer A, Pham MN, Greaney A, Arunachalam PS, et al.  
513 Elicitation of broadly protective sarbecovirus immunity by receptor-binding domain  
514 nanoparticle vaccines. *Cell* 2021;184:5432-5447.e16.
- 515 [32] Brouwer PJM, Brinkkemper M, Maisonnasse P, Dereuddre-Bosquet N, Grobben M,  
516 Claireaux M, et al. Two-component spike nanoparticle vaccine protects macaques from  
517 SARS-CoV-2 infection. *Cell* 2021;184:1188-1200.e19.
- 518 [33] Boyoglu-Barnum S, Ellis D, Gillespie RA, Hutchinson GB, Park Y-J, Moin SM, et al.  
519 Quadrivalent influenza nanoparticle vaccines induce broad protection. *Nature*  
520 2021;592:623–8.
- 521 [34] King NP, Bale JB, Sheffler W, McNamara DE, Gonen S, Gonen T, et al. Accurate design of  
522 co-assembling multi-component protein nanomaterials. *Nature* 2014;510:103–8.

- 523 [35] Bale JB, Gonen S, Liu Y, Sheffler W, Ellis D, Thomas C, et al. Accurate design of  
524 megadalton-scale two-component icosahedral protein complexes. *Science* 2016;353:389–  
525 94.
- 526 [36] Ueda G, Antanasijevic A, Fallas JA, Sheffler W, Copps J, Ellis D, et al. Tailored design of  
527 protein nanoparticle scaffolds for multivalent presentation of viral glycoprotein antigens.  
528 *Elife* 2020;9:e57659.
- 529 [37] Wargacki AJ, Wörner TP, van de Waterbeemd M, Ellis D, Heck AJR, King NP. Complete  
530 and cooperative in vitro assembly of computationally designed self-assembling protein  
531 nanomaterials. *Nat Commun* 2021;12:883.
- 532 [38] Arunachalam PS, Walls AC, Golden N, Atyeo C, Fischinger S, Li C, et al. Adjuvanting a  
533 subunit COVID-19 vaccine to induce protective immunity. *Nature* 2021;594:253–8.
- 534 [39] Ellis D, Brunette N, Crawford KHD, Walls AC, Pham MN, Chen C, et al. Stabilization of  
535 the SARS-CoV-2 Spike receptor-binding domain using deep mutational scanning and  
536 structure-based design. *Front Immunol* 2021;12:710263.
- 537 [40] Fluckiger A-C, Ontsouka B, Bozic J, Diress A, Ahmed T, Berthoud T, et al. An enveloped  
538 virus-like particle vaccine expressing a stabilized prefusion form of the SARS-CoV-2 spike  
539 protein elicits highly potent immunity. *Vaccine* 2021;39:4988–5001.
- 540 [41] Arunachalam PS, Feng Y, Ashraf U, Hu M, Walls AC, Edara VV, et al. Durable protection  
541 against the SARS-CoV-2 Omicron variant is induced by an adjuvanted subunit vaccine. *Sci*  
542 *Transl Med* 2022;14:eabq4130.
- 543 [42] Grigoryan L, Lee A, Walls AC, Lai L, Franco B, Arunachalam PS, et al. Adjuvanting a  
544 subunit SARS-CoV-2 vaccine with clinically relevant adjuvants induces durable protection  
545 in mice. *NPJ Vaccines* 2022;7:55.



- 546 [43] Song JY, Choi WS, Heo JY, Lee JS, Jung DS, Kim S-W, et al. Safety and immunogenicity  
547 of a SARS-CoV-2 recombinant protein nanoparticle vaccine (GBP510) adjuvanted with  
548 AS03: A randomised, placebo-controlled, observer-blinded phase 1/2 trial.  
549 *EClinicalMedicine* 2022;51:101569.
- 550 [44] Joyce MG, Chen W-H, Sankhala RS, Hajduczki A, Thomas PV, Choe M, et al. SARS-CoV-  
551 2 ferritin nanoparticle vaccines elicit broad SARS coronavirus immunogenicity. *Cell Rep*  
552 2021;37:110143.
- 553 [45] Saunders KO, Lee E, Parks R, Martinez DR, Li D, Chen H, et al. Neutralizing antibody  
554 vaccine for pandemic and pre-emergent coronaviruses. *Nature* 2021;594:553–9.
- 555 [46] Dalvie NC, Tostanoski LH, Rodriguez-Aponte SA, Kaur K, Bajoria S, Kumru OS, et al.  
556 SARS-CoV-2 receptor binding domain displayed on HBsAg virus-like particles elicits  
557 protective immunity in macaques. *Sci Adv* 2022;8:eabl6015.
- 558 [47] Tan TK, Rijal P, Rahikainen R, Keeble AH, Schimanski L, Hussain S, et al. A COVID-19  
559 vaccine candidate using SpyCatcher multimerization of the SARS-CoV-2 spike protein  
560 receptor-binding domain induces potent neutralising antibody responses. *Nat Commun*  
561 2021;12:542.
- 562 [48] Dalvie NC, Rodriguez-Aponte SA, Hartwell BL, Tostanoski LH, Biedermann AM, Crowell  
563 LE, et al. Engineered SARS-CoV-2 receptor binding domain improves manufacturability in  
564 yeast and immunogenicity in mice. *Proc Natl Acad Sci U S A* 2021;118:e2106845118.
- 565 [49] Cohen AA, Gnanapragasam PNP, Lee YE, Hoffman PR, Ou S, Kakutani LM, et al. Mosaic  
566 nanoparticles elicit cross-reactive immune responses to zoonotic coronaviruses in mice.  
567 *Science* 2021;371:735–41.

568 [50] Hsia Y, Bale JB, Gonen S, Shi D, Sheffler W, Fong KK, et al. Design of a hyperstable 60-  
569 subunit protein dodecahedron. [corrected]. Nature 2016;535:136–9.

## 570 **Figure captions**

571 **Figure 1:** Production and characterization of IVX-411 VLPs. **(A)** Schematic of *in vitro*  
572 assembly. **(B)** UV-Vis spectroscopy. **(C)** Dynamic Light Scattering. **(D)** Size Exclusion  
573 Chromatography. **(E)** Biolayer Interferometry. **(F)** Negative stain Transmission Electron  
574 Microscopy.

575 **Figure 2:** Immunization with IVX-411 elicits neutralizing antibodies against four SARS-CoV-2  
576 strains. **(A)** Female BALB/c mice were immunized IM on Day 0 and Day 21 with IVX-411  
577 formulated with MF59 and bled on Day 0 (pre-immunization), Day 21, and Day 35 (n = 8).  
578 Serum neutralizing titers against the ancestral strain **(B)**, as well as the beta **(C)**, gamma **(D)**, and  
579 delta **(E)** variants were measured using a cell-based pseudo-particle neutralization assay. Human  
580 convalescent serum (HCS) was used as a positive control. Dashed horizontal line represents the  
581 lower limit of quantitation. P-values were calculated in GraphPad Prism 9 using a Wilcoxon  
582 matched-pairs signed rank test. \*, P< 0.05; \*\*, P<0.01.

583 **Figure 3:** Immunization with IVX-411 elicits higher neutralizing titers and a larger antigen-  
584 specific LLPC compartment than immunization with soluble protein. **A)** Female BALB/c mice  
585 were immunized IM with IVX-411, RBD-CompA, or S-2P formulated with or without MF59 on  
586 Day 0 and Day 21. Serum was collected on days 0, 20, 35, 63, 91, 119, and 154. Mice were  
587 sacrificed and bone marrow was collected on Day 154 for isolation of LLPCs (n = 10). **(B)**  
588 Serum neutralizing titers against the ancestral SARS-CoV-2 strain. **(C)** ELISpot measuring the  
589 frequency of RBD-specific LLPCs in the bone marrow. Dashed horizontal line represents the  
590 lower limit of quantitation. P-values were calculated in GraphPad Prism 9 using a Mann-

591 Whitney test or a Kruskal-Wallis test followed by a Dunn's multiple comparisons test. \*,  $P <$   
592 0.05; \*\*,  $P < 0.01$ ; \*\*\*,  $P < 0.001$ ; \*\*\*\*,  $P < 0.0001$ .

593 **Figure 4:** Immunization of Syrian Golden hamsters with IVX-411 reduces severity of SARS-  
594 CoV-2 infection. **(A)** Male Syrian Golden hamsters were immunized IM with phosphate buffered  
595 saline (PBS) or IVX-411 formulated with MF59 on days 0 and 21. Hamsters in all groups except  
596 the PBS, Unchallenged group were inoculated intranasally with one of two SARS-CoV-2  
597 isolates on Day 42. All hamsters were bled on days 0, 21, and 35. Body weights were recorded  
598 daily starting on Day 39 until Day 47 when the animals were sacrificed ( $n = 8$ ). **(B)** Body  
599 weights represented as percentage of starting weight prior to challenge. **(C)** Lung weights  
600 represented as a percentage of total body weight post challenge. **(D)** Histopathological analysis  
601 was performed on lungs collected from each animal. Findings were graded on a scale of 1-5 (1 =  
602 Minimal, 2 = Mild, 3 = Moderate, 4 = Marked, 5 = Severe). The average severity score for each  
603 group is reported. P-values were calculated in GraphPad Prism 9 using a Mann-Whitney test or a  
604 Kruskal-Wallis test followed by a Dunn's multiple comparisons test. \*,  $P < 0.05$ ; \*\*,  $P < 0.01$ ;  
605 \*\*\*,  $P < 0.001$ ; \*\*\*\*,  $P < 0.0001$ .

606 **Figure 5:** Prophylactic immunization with IVX-411 elicits neutralizing antibodies and results in  
607 decreased viral load upon challenge in Syrian Golden hamsters. Number of N **(A)** or E **(B)** gene  
608 copies present in lung tissue or nasal swab of Syrian Golden hamsters challenged with  
609 WA1/2020 or B.1.617.2 ( $n = 8$ ). **(C)** Neutralizing antibody titers against the ancestral strain and  
610 delta variant on Day 0 and Day 35 in hamsters immunized with IVX-411. Dashed horizontal line  
611 represents the lower limit of quantitation. P-values were calculated in GraphPad Prism 9 using a  
612 Mann-Whitney test or a Kruskal-Wallis test followed by a Dunn's multiple comparisons test. \*,  
613  $P < 0.05$ ; \*\*,  $P < 0.01$ ; \*\*\*,  $P < 0.001$ ; \*\*\*\*,  $P < 0.0001$ .

614 **Supplemental Figure 1:** (A) UV-Vis spectroscopy and (B) SDS-PAGE of purified RBD-  
615 CompA trimeric component.

# Figure 1

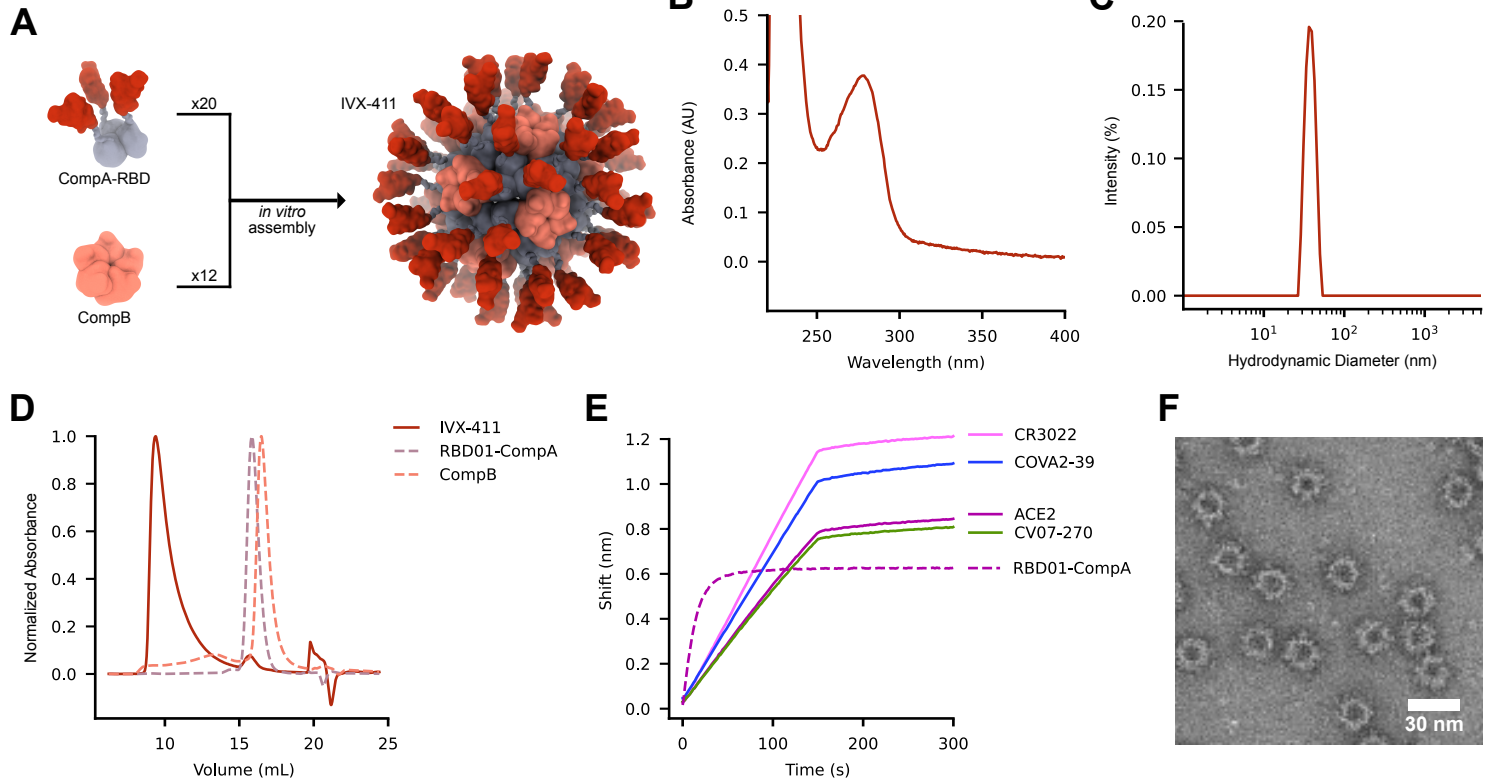

# Figure 2

A

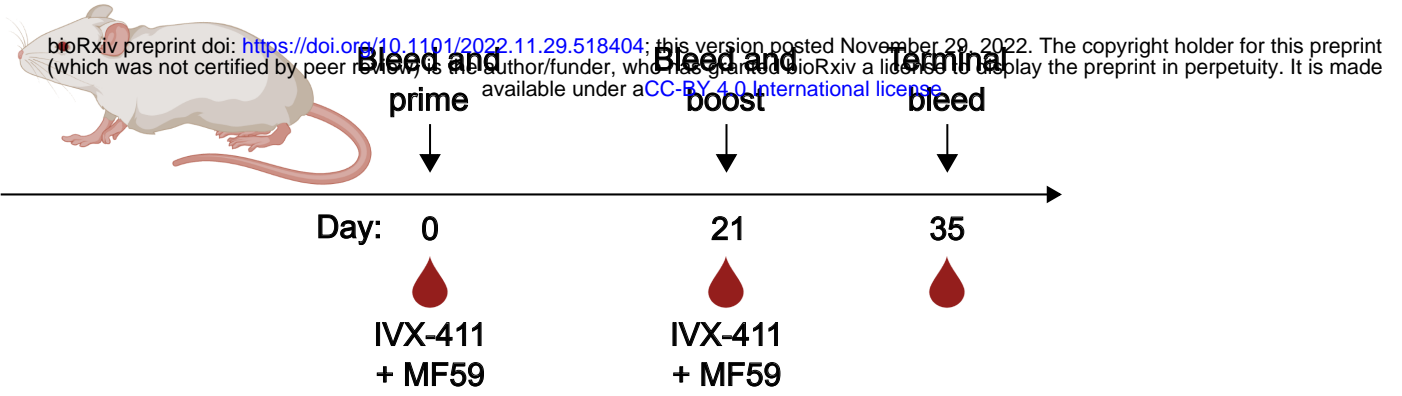

B

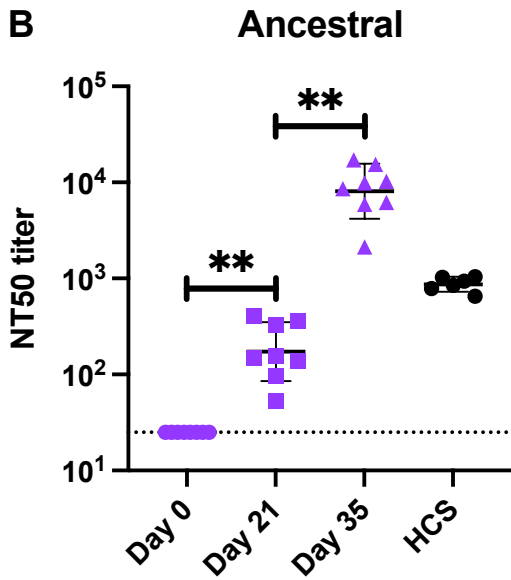

C

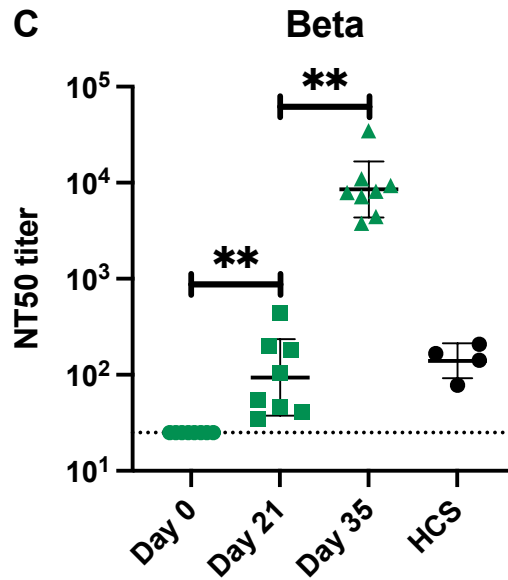

D

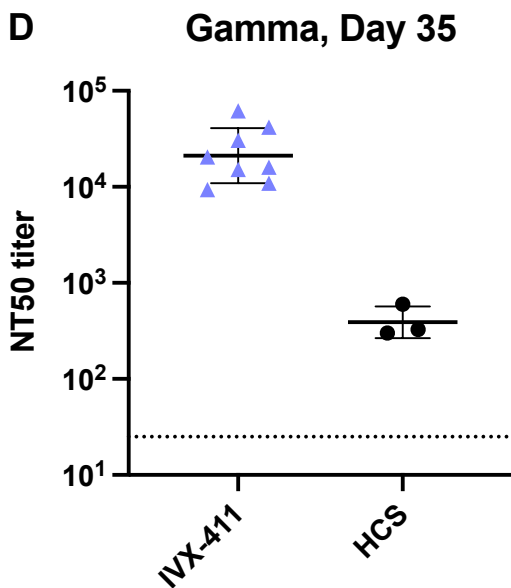

E

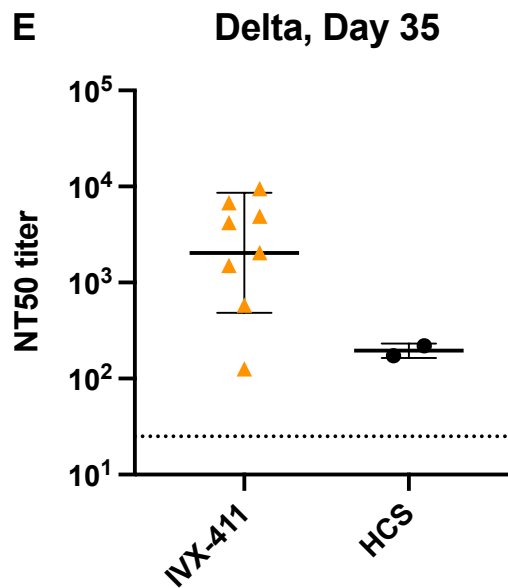

# Figure 3

bioRxiv preprint doi: <https://doi.org/10.1101/2022.11.29.518404>; this version posted November 29, 2022. The copyright holder for this preprint (which was not certified by peer review) is the author/funder, who has granted bioRxiv a license to display the preprint in perpetuity. It is made available under aCC-BY 4.0 International license.

**A**

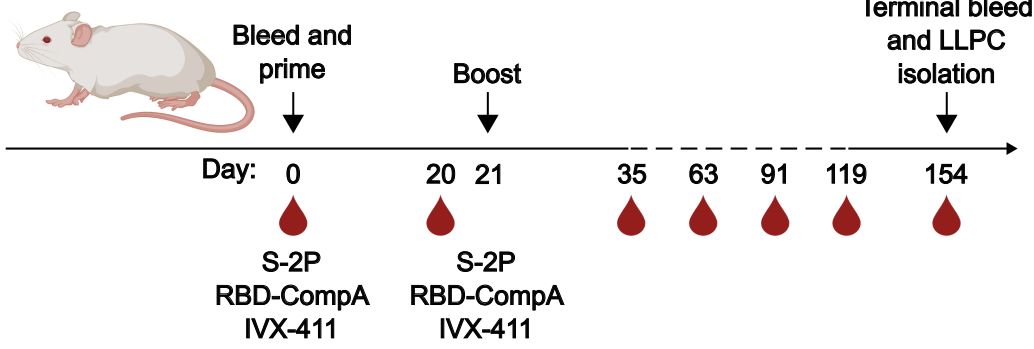

**C**

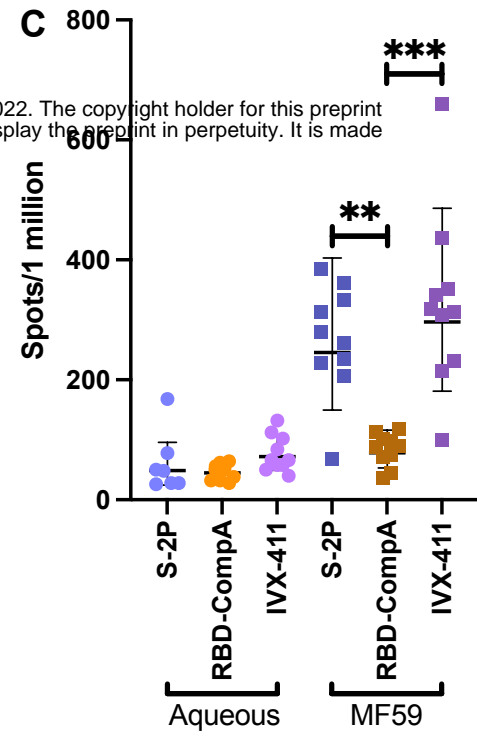

**B**

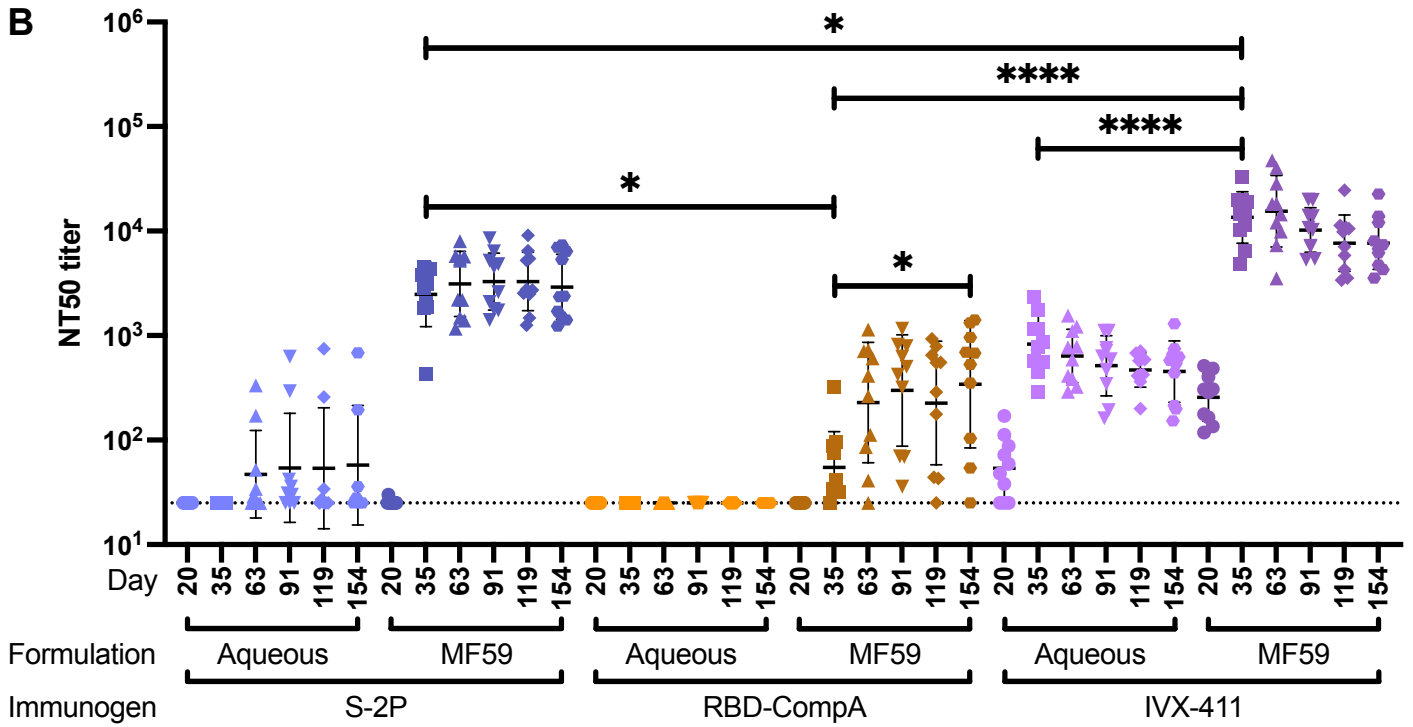

# Figure 4

## A

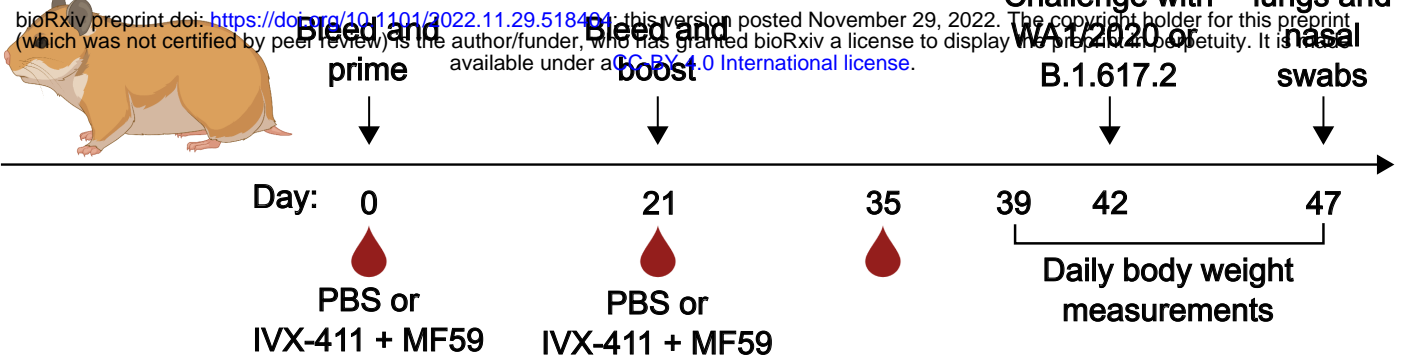

## B

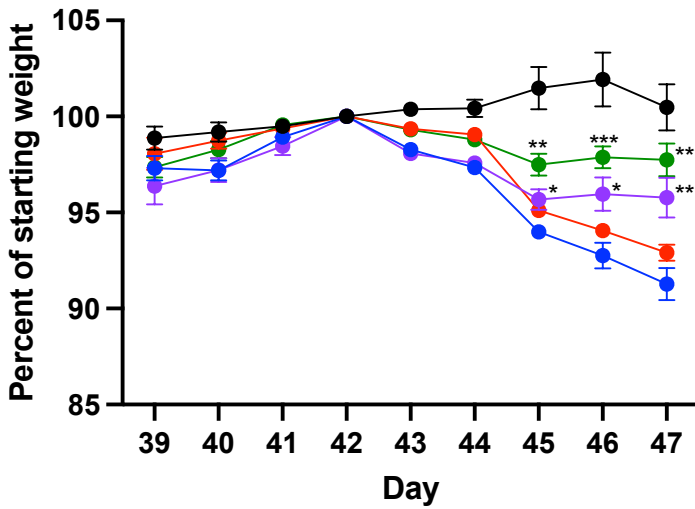

## C

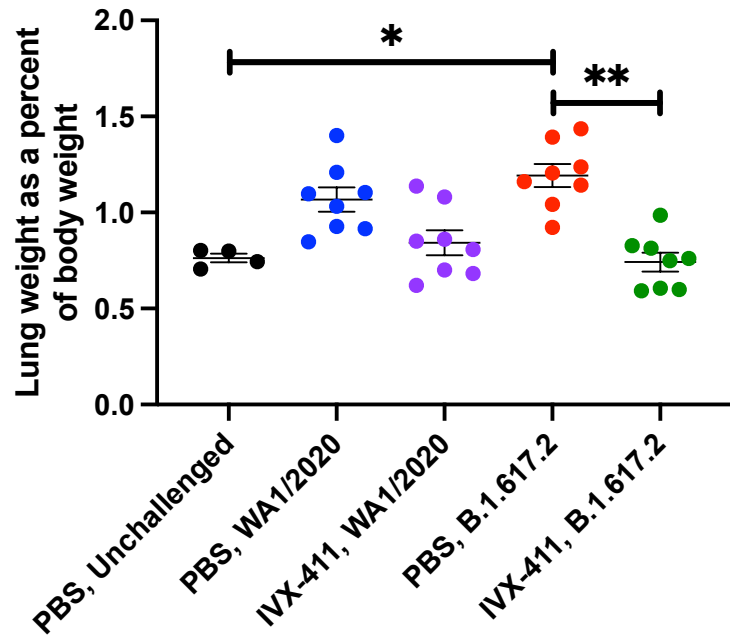

## D

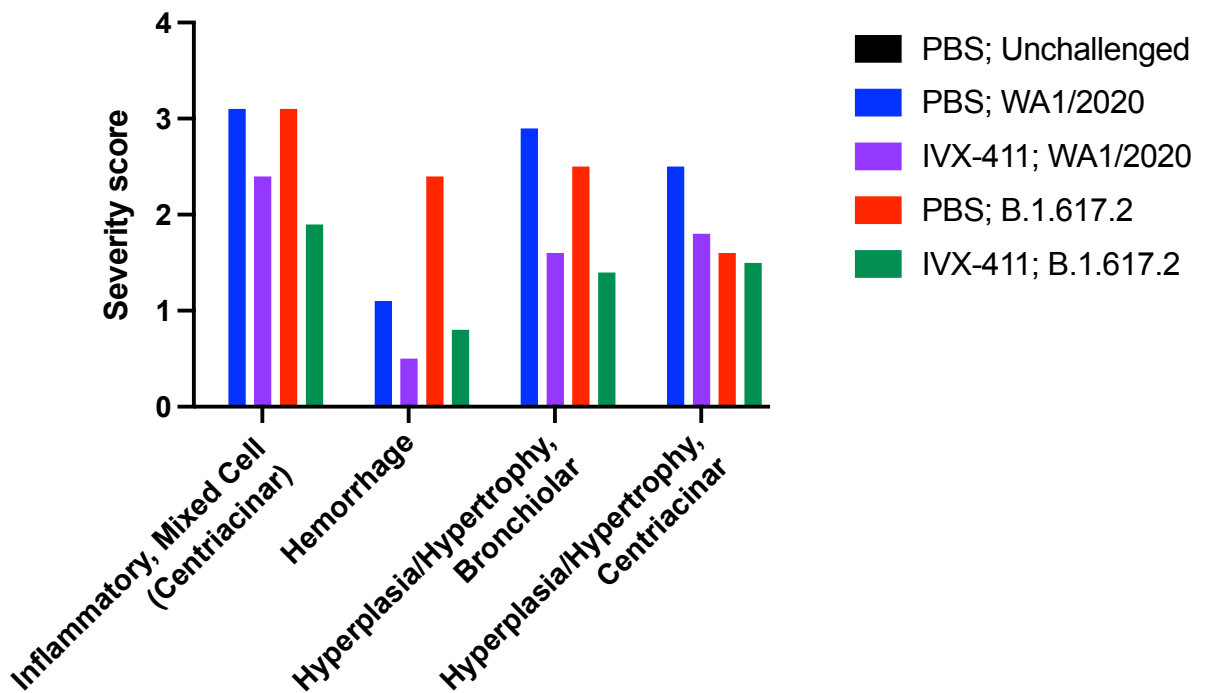



# Figure 5

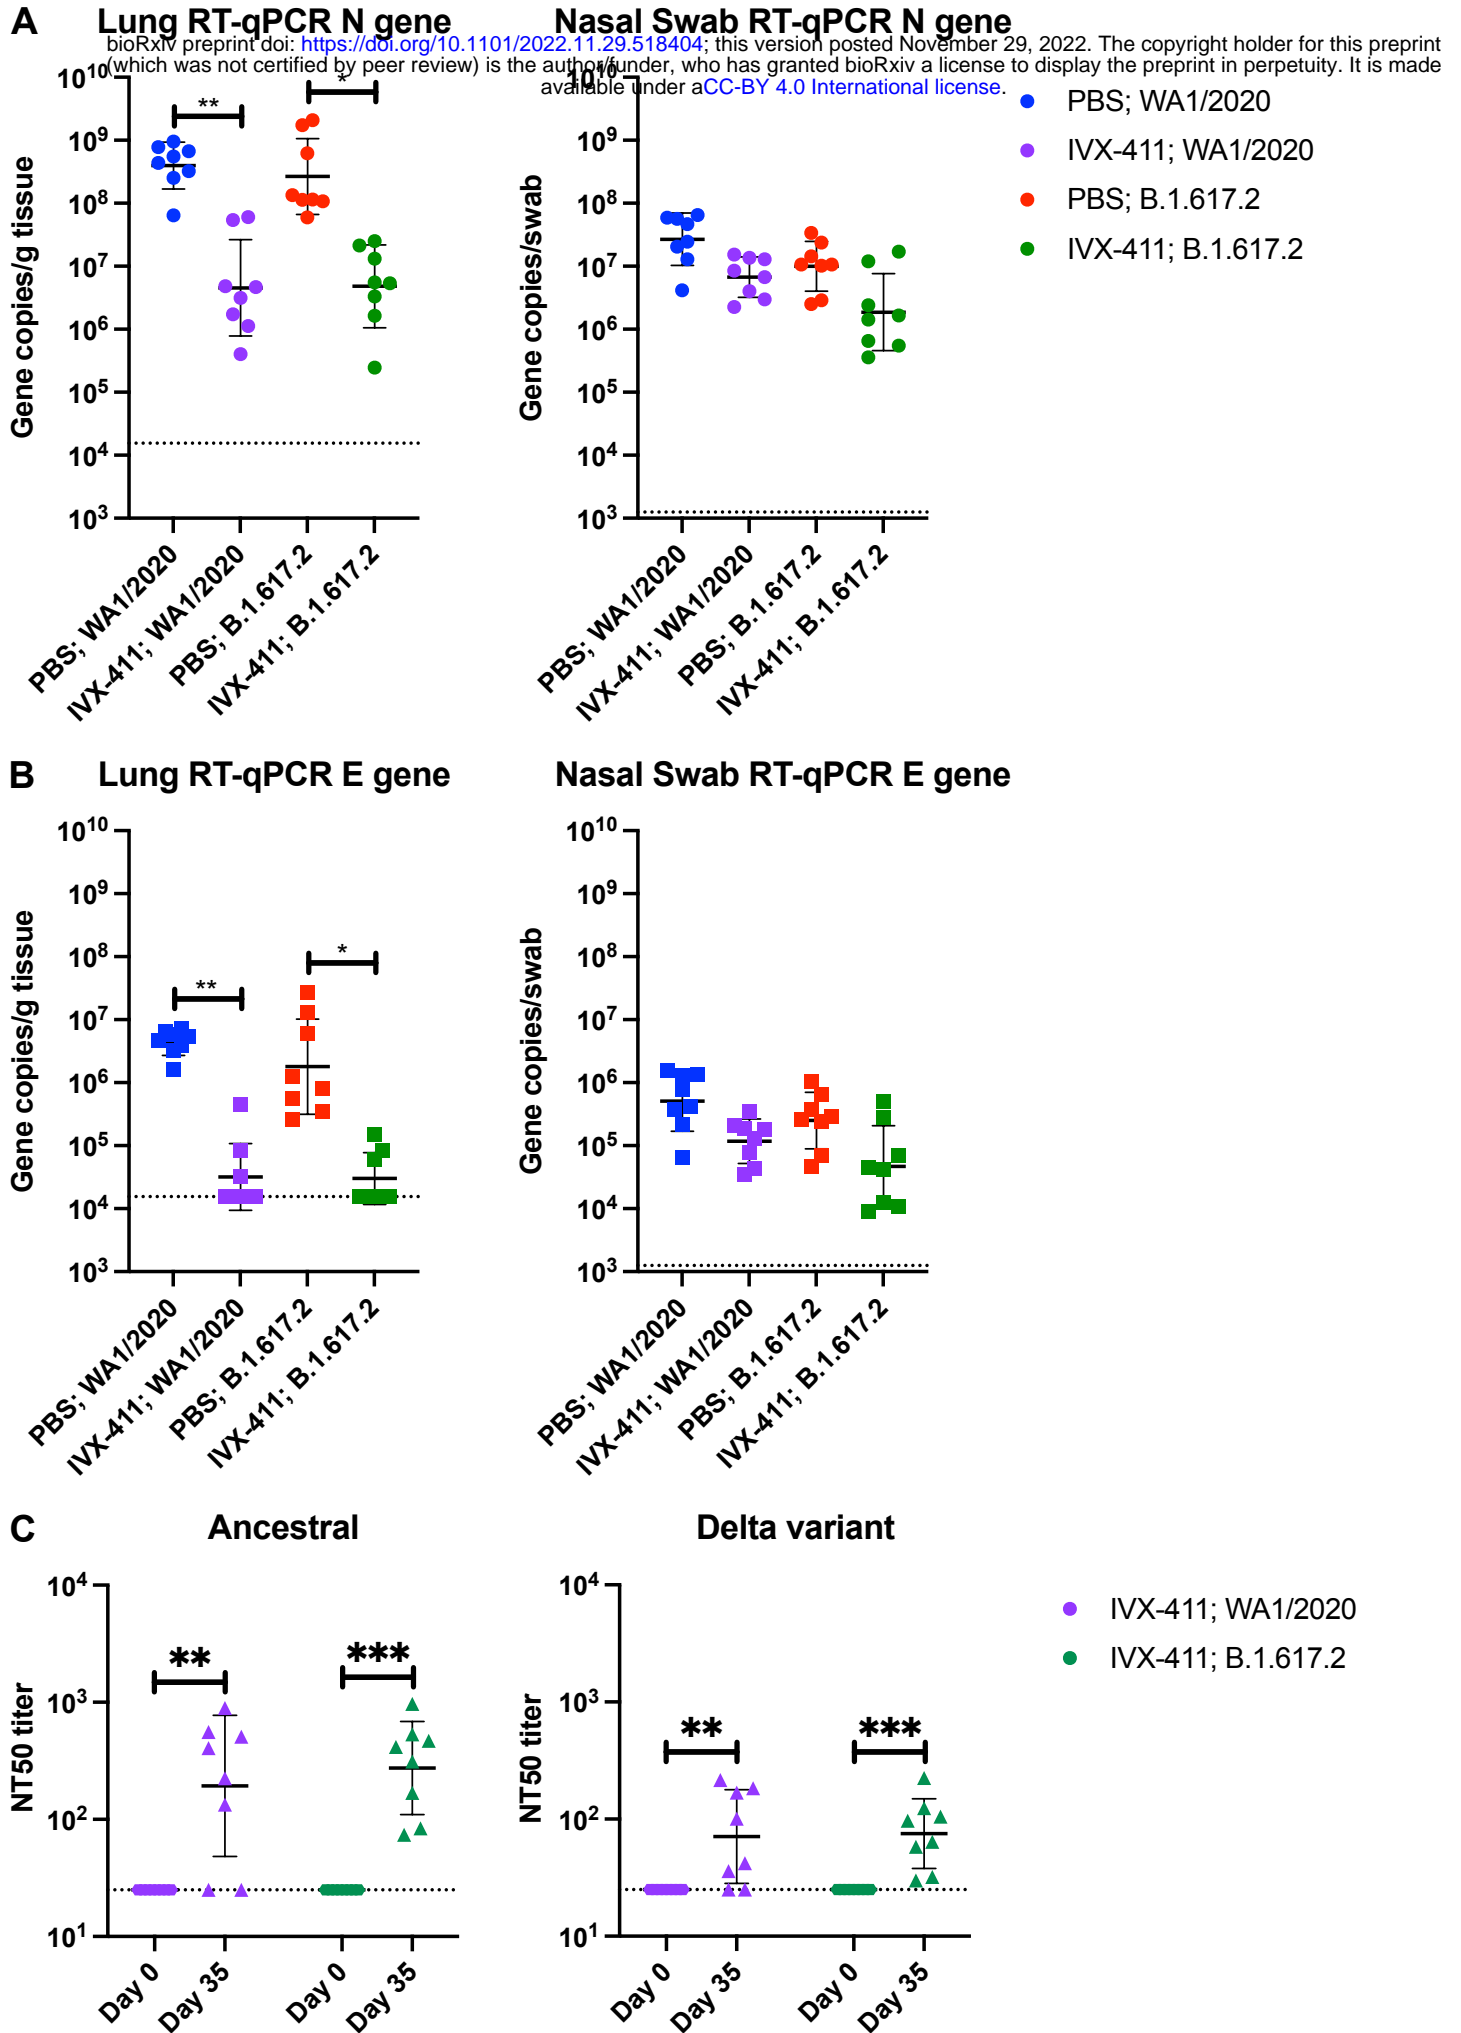

Source: http://biorxiv.org/content/10.1101/2022.11.29.518404v1.full.pdf
